# Supplementary material for: Pd nanoparticle-decorated graphitic C3N4nanosheets with bifunctional peroxidase mimicking and ON–OFF fluorescence enable naked-eye and fluorescent dual-readout sensing of glucose
Source: Royal Society of Chemistry journal article supplement (doi:10.1039/c8tb02110d), 2018-11-28
Supplement: c8tb02110d1.pdf [file c8tb02110d1.pdf]

Supplementary Information for

**Pd nanoparticles-decorated graphitic C<sub>3</sub>N<sub>4</sub> nanosheets with  
bifunctional peroxidase mimicking and ON-OFF fluorescence  
enable naked-eye and fluorescent dual-readout sensing of  
glucose**

Wenchi Zhang, Xin Li, Xuechao Xu, Yanfang He, Fengxian Qiu,\* Jianming Pan,

Xiangheng Niu\*

Institute of Green Chemistry and Chemical Technology, School of Chemistry and  
Chemical Engineering, Jiangsu University, Zhenjiang 212013, China

\* Corresponding author. E-mail: fxqiu@ujs.edu.cn; niuxiangheng@126.com

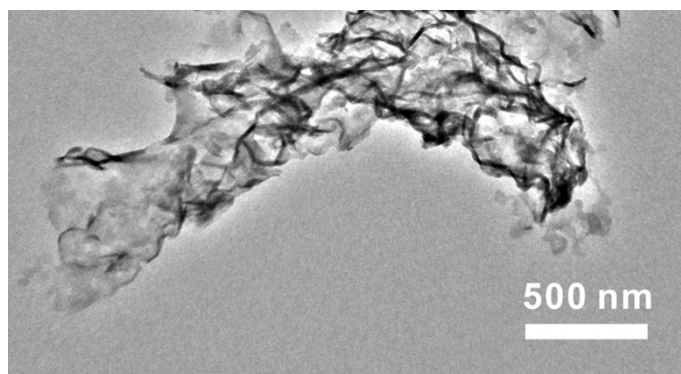

**Figure S1.** TEM image of the synthesized g-C<sub>3</sub>N<sub>4</sub> nanosheets.

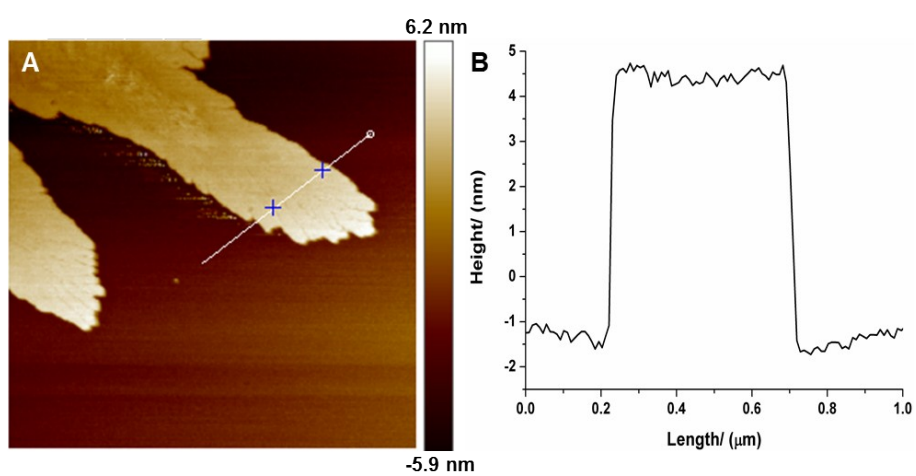

**Figure S2.** AFM image of the synthesized g-C<sub>3</sub>N<sub>4</sub> nanosheets.

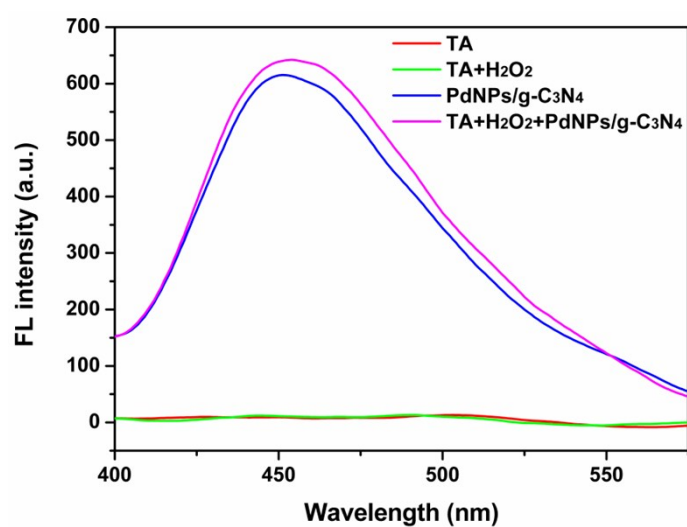

**Figure S3.** Fluorescence spectra for the capture of hydroxyl radicals generated in

systems. The excitation wavelength was 330 nm.

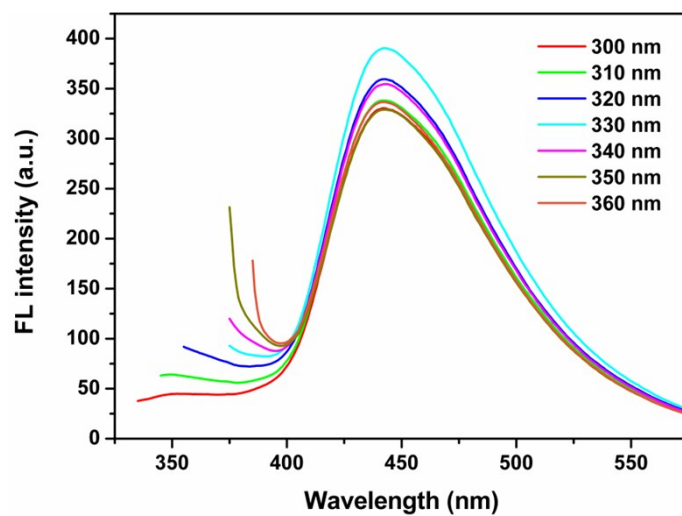

**Figure S4.** Fluorescence spectra of the synthesized PdNPs/g-C<sub>3</sub>N<sub>4</sub> with different excitation wavelengths.

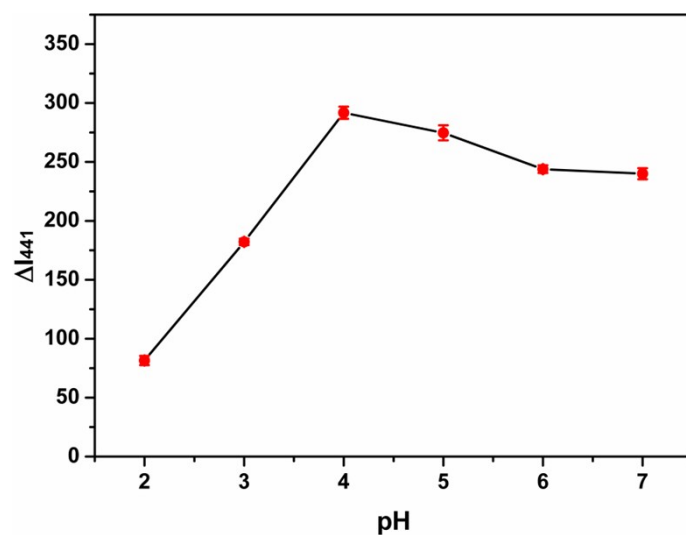

**Figure S5.** Fluorescence responses of the GOx+glucose+PdNPs/g-C<sub>3</sub>N<sub>4</sub>+OPD system in buffers with different pH values.

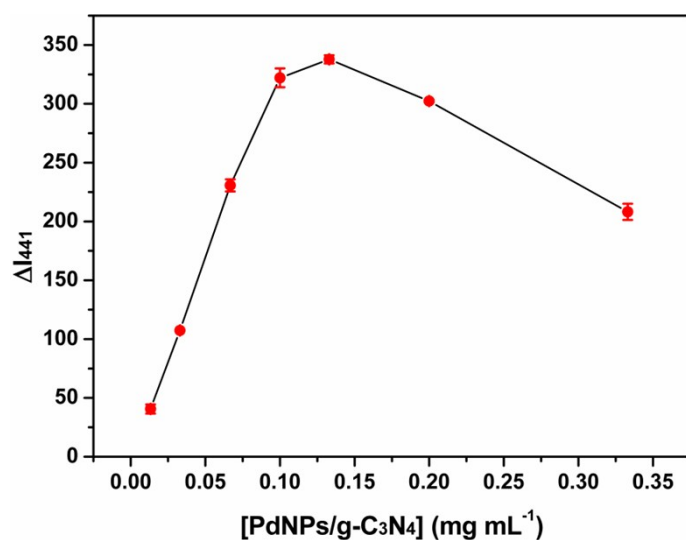

**Figure S6.** Fluorescence responses of the GO<sub>x</sub>+glucose+PdNPs/g-C<sub>3</sub>N<sub>4</sub>+OPD system with different concentrations of PdNPs/g-C<sub>3</sub>N<sub>4</sub>.

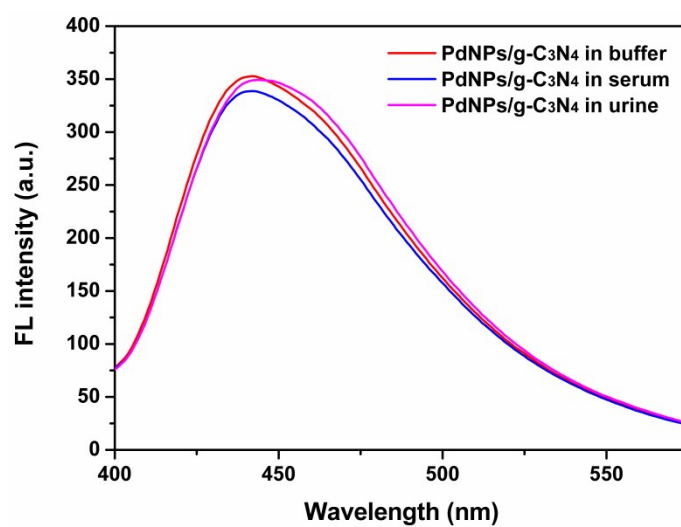

**Figure S7.** Fluorescence spectra of the synthesized PdNPs/g-C<sub>3</sub>N<sub>4</sub> in different matrices.

**Table S1.** Performance comparison of different peroxidase mimics coupled with GO<sub>x</sub> for glucose sensing.

| Peroxidase mimic | Method | Linear | LOD | Ref. |
|------------------|--------|--------|-----|------|
|------------------|--------|--------|-----|------|

| range                                 |              |          |      |           |
|---------------------------------------|--------------|----------|------|-----------|
| Fe <sub>3</sub> O <sub>4</sub> MNPs   | Colorimetric | 50~1,000 | 30   | 1         |
| WSe <sub>2</sub> nanosheets           | Colorimetric | 10~60    | 10   | 2         |
| Co <sub>3</sub> O <sub>4</sub> /rGO   | Colorimetric | 1~100    | 1    | 3         |
| VS <sub>2</sub> nanosheets            | Colorimetric | 5~250    | 1.54 | 4         |
| GO                                    | Colorimetric | 1~20     | 1    | 5         |
| MnO <sub>2</sub> NWs                  | Colorimetric | 10~2,000 | 2    | 6         |
| (+)-Au NPs                            | Colorimetric | 18~1,100 | 4    | 7         |
| MnO <sub>2</sub> -modified UCNPs      | Fluorescent  | 0~250    | 3.7  | 8         |
| PdNPs/g-C <sub>3</sub> N <sub>4</sub> | Naked-eye    | 50~2,000 | 50   | This work |
|                                       | Fluorescent  | 1~1,000  | 0.4  |           |

## References

1. H. Wei and E. K. Wang, *Anal. Chem.*, 2008, **80**, 2250-2254.
2. T. M. Chen, X. J. Wu, J. X. Wang and G. W. Yang, *Nanoscale*, 2017, **9**, 11806-11813.
3. J. X. Xie, H. Y. Cao, H. Jiang, Y. J. Chen, W. B. Shi, H. Z. Zheng and Y. M. Huang, *Anal. Chim. Acta*, 2013, **796**, 92-100.
4. L. J. Huang, W. X. Zhu, W. T. Zhang, K. Chen, J. Wang, R. Wang, Q. F. Yang, N. Hu, Y. R. Suo and J. L. Wang, *Microchim. Acta*, 2018, **185**, 7.
5. Y. J. Song, K. G. Qu, C. Zhao, J. S. Ren and X. G. Qu, *Adv. Mater.*, 2010, **22**, 2206-2210.

6. L. Han, J. G. Shi and A. H. Liu, *Sens. Actuators, B*, 2017, **252**, 919-926.
7. Y. Jv, B. X. Li and R. Cao, *Chem. Commun.*, 2011, **46**, 8017-8019.
8. J. Yuan, Y. Cen, X. J. Kong, S. Wu, C. L. Liu, R. Q. Yu and X. Chu, *ACS Appl. Mater. Interfaces*, 2015, **7**, 10548-10555.
